# Supplementary material for: Current Status of Pearl Millet Downy Mildew Prevalence across Agroecological Zones of Senegal
Source: ScientificWorldJournal. 2019 Jul 7;2019:1252653. doi: 10.1155/2019/1252653 (PMC6642752; doi:10.1155/2019/1252653)
Supplement: Supplementary Materials — The data are on excel file and are located on sheet one. In the excel file you will find geographical and downy mildew incidence information. [file 1252653.f1.xlsx]

## Sheet: Feuil1
num	long	lat	label	Inc1	area	Region	areatot	id	nplantdis	ntotalplt	plant	Inc
1	-16.77542	14.97514	a1	16.93	38.67	Thies	10184	ThiÃ¨s	62	366	Souna	16.9398907103825
2	-16.88392	14.86675	a2	8.9	1.519	Thies	15324	ThiÃ¨s	31	348	Souna	8.9080459770115
3	-16.72750	14.76381	a3	50.95	349.81	Thies	30541	ThiÃ¨s	187	367	Souna	50.9536784741144
4	-16.62786	14.74483	a4	36.04	83.51	Thies	10251	ThiÃ¨s	133	369	Souna	36.0433604336043
5	-16.51606	14.70861	a5	23.09	104.86	Diourbel	20142	Diourbel	85	368	Souna	23.0978260869565
6	-16.44947	14.67858	a6	17.9	443.85	Diourbel	11485	Diourbel	65	363	Souna	17.9063360881543
7	-16.43950	14.65472	a7	10.86	25.54	Diourbel	10423	Diourbel	40	368	Souna	10.8695652173913
8	-16.41733	14.59847	a8	45.98	214.77	Diourbel	20386	Diourbel	172	374	Souna	45.9893048128342
9	-16.41447	14.58914	a9	22.1	55.95	Fatick	10875	Fatick	84	380	Souna	22.1052631578947
10	-16.41133	14.56781	a10	38.93	92.9	Fatick	10389	Fatick	146	375	Souna	38.9333333333333
11	-16.39958	14.50303	a11	46.97	107.13	Fatick	10228	Fatick	171	364	Souna	46.978021978022
12	-16.40819	14.40011	a12	43.01	100.42	Fatick	10247	Fatick	160	372	Souna	43.010752688172
13	-16.02331	14.16031	a13	73	510.61	Kaolack	30425	Kaolack	274	376	Souna	72.8723404255319
14	-16.01144	14.15047	a14	83	182.29	Kaolack	40842	Kaolack	72.87	363	Souna	20.0743801652893
15	-15.94264	14.12647	a15	91.84	626.19	Kaolack	30247	Kaolack	338	368	Souna	91.8478260869565
16	-15.89664	14.12956	a16	88	607.62	Kaolack	30142	Kaolack	329	374	Souna	87.9679144385027
17	-15.76667	14.13639	a17	76.07	348.15	Kaffrine	20085	Kaffrine	283	372	Souna	76.0752688172043
18	-15.73000	14.11244	a18	83.98	588.47	Kaffrine	30024	Kaffrine	320	381	Souna	83.989501312336
19	-15.52308	14.10550	a19	92.87	424.76	Kaffrine	20457	Kaffrine	339	365	Souna	92.8767123287671
20	-15.47583	14.10494	a20	95.64	602.4571	Kaffrine	20412	Kaffrine	205	367	Souna	55.858310626703
26	-13.94228	13.82492	a21	98.09	1754.14234	Tambacounda	10425	Tambacounda	361	368	Souna	98.0978260869565
28	-13.77975	13.72997	a22	91.1	1845.34764	Tambacounda	15403	Tambacounda	357	372	Souna	95.9677419354839
29	-14.74611	12.84156	a23	98.42	1956.32478	Kolda	14300	Kolda	338	371	Sanio	91.1051212938005
30	-14.94586	12.86425	a24	97.6	2001.6547	Kolda	10247	Kolda	280	376	Sanio	74.468085106383
31	-15.32417	12.87397	a25	98.654	1984.2476	Sedhiou	10245	SÃ©dhiou	279	367	Sanio	76.0217983651226
33	-15.59083	12.84128	a26	97.5	2154.2486	Sedhiou	3840	SÃ©dhiou	353	364	Sanio	96.978021978022
